# Supplementary material
Source: publisher figshare collection journal article supplement (https://acs.figshare.com/ndownloader/files/4618732)
Supplement: Supplementary file 1 [file 4618732]

**supplemental Fig. 1**

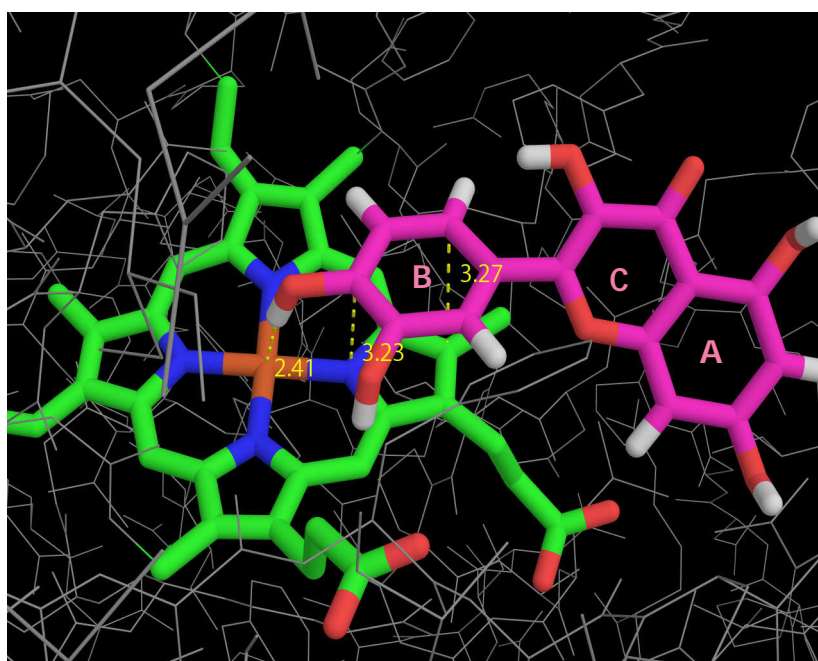

**Supplemental Figure 1. Calculated distance between quercetin and heme moiety of MPO in a computer docking simulation.**
